# Supplementary material for: Non-senescent Hydra tolerates severe disturbances in the nuclear lamina
Source: Aging (Albany NY). 2018 May 10;10(5):951–72. doi: 10.18632/aging.101440 (PMC5990382; doi:10.18632/aging.101440)
Supplement: Supplementary Dataset 1 [file aging-10-101440-s003.xlsx]

## Sheet: blast results
Supplementary Dataset 1. Repertoire of genes coding for lamin-binding proteins is restricted in non-senescent organisms.
Phylogenetic distribution of 16 genes coding for lamin-binding proteins as revealed by BLAST-screening of nucleotide sequence databases of 13 unicellular and multicellular organisms.
Human protein sequences were used as query. Homologues of human lamin-binding proteins clearly present in other organisms with e-value <E-05 are highlighted green.
Homologues that demonstrated low similarity (e-value >E-05) and/or that retrieved members of other gene families, not relevant to lamin-bining proteins, upon reciprocal BLAST using UniProt, are shadowed grey.
Query		Dictyostelium			Saccharomyces			Schizosaccharomyces			Monosiga			Trichoplax			Amphimedon			Nematostella			Hydra			Drosophila			Octopus			Strongylocentrotus			Danio			Homo
Protein	UniProt#	best hit	e-value	score	best hit	e-value	score	best hit	e-value	score	best hit	e-value	score	best hit	e-value	score	best hit	e-value	score	best hit	e-value	score	best hit	e-value	score	best hit	e-value	score	best hit	e-value	score	best hit	e-value	score	best hit	e-value	score	best hit	e-value	score
NUP62	P37198	XM_003284903.1	4e-21	97.4	NM_001181474.3	2.7e-13	78.2	NM_001019582.2	3.5e-20	94	XM_001744220.1	9.8e-21	95.1	XM_002115466.1	3e-41	145	XM_019993681.1	1.55e-46	174	XM_001629510.1	1.74e-75	246	U43574.1	8e-64	218	NM_001299560.1	1e-48	179	XM_014912358.1	2e-69	236	XM_011680874.1	6.04e-30	114	NM_001113596.1	2.27e-107	335	NM_012346.4	0	547
LMNB1	P20700	no_hit			no_hit			XM_013166825.1	3	31.6	no_hit			XM_002107910.1	1e-11	65.9	XM_011407353.2	5e-40	155	XM_001629238.1	3e-57	204	NM_001309711.2	1e-30	127	XM_023178132.1	3e-89	298	XM_014916662.1	6e-69	238	NM_214500.1	3e-64	223	BC068414.1	0	625	BC012295.1	0	974
LBR	Q14739	XM_003285483.1	1.06e-87	283	NM_001183118.1	1.69e-89	288	NM_001023787.2	1.54e-120	365	XM_001749659.1	2.27e-129	394	XM_002117184.1	8.47e-139	409	XM_020007439.1	3.84e-142	421	XM_001623649.1	3.47e-135	401	XM_004206522.2	2.43e-64	226	XM_023317712.1	6e-27	122	XM_014931058.1	2e-130	394	XM_003723624.2	6.3e-125	404	XM_021468371.1	0	609	NM_002296.3	0	1160
MAN1=LEMD3	Q9Y2U8	XM_003283713.1	3e-11	67.4	no_hit			NM_001019851.2	1.86e-11	67.8	XM_001743519.1	2.54e-13	73.6	XM_002112624.1	2.4e-51	179	XM_019998509.1	1.26e-51	191	XM_001633738.1	9.82e-87	290	XM_002168631.3	1.01e-66	239	XM_018103200.1	3e-26	117	XM_014929342.1	3e-81	282	XM_011675522.1	1e-85	290	BC168502.1	0	604	AF112299	0	1430
BAF=BANF1	O75531	no_hit			no_hit			no_hit			no_hit			XM_002115730.1	5.32e-43	134	XM_003385015.3	3.35e-44	140	XM_001632299.1	1.1e-42	137	XM_002160086.3	8.27e-44	137	XM_001989196.1	6e-40	131	XM_014922797.1	1e-36	121	XM_782899.3	4.44e-39	130	NM_205562.1	6.97e-45	152	AF070447	4.31e-60	183
GCL=GMCL	Q96IK5	no_hit			no_hit			XM_002174223.2	3e-13	72.4	XM_001750501.1	1.37e-07	52.8	XM_002108870.1	1.69e-31	123	XM_019995808.1	2.1e-132	395	XM_001634646.1	6.45e-117	361	XM_012704747.1	3.62e-111	342	XM_018012053.1	4e-98	318	XM_014923421.1	1e-74	237	XM_779440.4	6.42e-163	475	NM_207050.1	0	734	NM_178439.4	0	984
SUN1	O94901	XM_639832.1	2.22e-23	107	no_hit			X85105.1	1.22e-19	94	XM_001747010.1	9.36e-12	67.8	XM_002113945.1	1.43e-23	102	XM_019997198.1	3.07e-37	150	XM_001632095.1	9.56e-56	190	XM_012702376.1	1.76e-41	159	BT122181.1	6e-70	245	XM_014932708.1	4e-70	253	XM_011666622.1	1.87e-72	258	NM_001018135.2	4.34e-110	371	BC152418.1	0	1529
LAP1=TOR1AIP1	Q5JTV8	XM_641505.1	0.78	33.1	no_hit			no_hit			XM_001744911.1	2.1	30.8	XM_002112374.1	6.8	28.5	no_hit			XM_001622055.1	2.57e-17	79.7	XM_012701524.1	5.2	30	no_hit			XM_014922169.1	8.3	30	XM_003726792.2	4.19e-17	87	BC164353.1	2.94e-54	192	NM_015602.3	0	1060
Nesprin-1=SYNE1	Q8NF91	Y00689.1	1.96e-33	144	no_hit			XM_013161645.1	3e-30	132	XM_001743390.1	1.99e-39	164	XM_002117336.1	6.43e-41	168	XM_020005539.1	3.37e-46	175	XM_001621151.1	3.15e-46	173	XM_012700959.1	2.91e-42	174	XM_017100983.1	7e-142	511	XM_014931893.1	0	759	XM_780118.4	0	591	XM_009292833.3	0	9345	NM_182961.3	0	16882
Nesprin-2=SYNE2	Q8WXH0	XM_641887.1	8.11e-32	138	NM_001180437.3	0.000146	54.3	XM_013161645.1	3e-30	132	XM_001743390.1	3.72e-36	152	XM_002117334.1	3.47e-43	175	XM_020005539.1	2.66e-42	163	XM_001621151.1	4.72e-42	160	XM_012700959.1	2.33e-47	190	XM_017100984.1	4e-61	242	XM_014931909.1	6e-150	531	XM_780118.4	7e-155	514	XM_021468616.1	0	1237	NM_015180.4	0	13343
LAP2a=TMPO	P42166	no_hit			no_hit			no_hit			no_hit			XM_002108148.1	2.94e-13	69.3	XM_019999879.1	0.35	34.7	no_hit			no_hit			no_hit			XM_014933853.1	5.8	30.8	XM_011675534.1	0.2	36.2	NM_001328565.1	2e-36	149	NM_003276.2	0	1311
LAP2b	P14267	XM_003292665.1	9.9	28.9	no_hit			no_hit			no_hit			XM_002108148.1	1e-13	69.7	no_hit			no_hit			no_hit			no_hit			no_hit			XM_011675534.1	0.13	36.2	AJ320191.1	9e-44	165	NM_001032283.2	0	817
Nurim=NRM29	Q8IXM6	XM_004367000.1	7.64e-09	56.2	no_hit			no_hit			AF440360.1	3.4	28.5	no_hit			XM_011404556.2	4.83e-18	82.8	no_hit			no_hit			XM_017985510.1	2e-19	90.1	no_hit			XM_781836.4	9.6	28.9	NM_001045195.1	2.26e-65	209	AK315190.1	2.56e-140	400
Emerin=EMD	P50402	no_hit			no_hit			no_hit			XM_001745242.1	7.6	27.3	no_hit			XM_011404313.2	0.064	34.7	no_hit			XM_002158363.3	0.074	33.9	XM_002023793.1	8.6	33.9	no_hit			XM_011681477.1	0.65	32.7	XM_021474527.1	0.0006	46	BT007401.1	1.64e-139	397
BTF=BCLAF1	Q9NYF8	no_hit			no_hit			no_hit			no_hit			no_hit			no_hit			XM_001638350.1	5.8	30.4	no_hit			no_hit			no_hit			no_hit			NM_214815.1	4e-30	134	NM_001301038.1	0	1092
LEMD1	Q68G75	no_hit			no_hit			no_hit			no_hit			XM_002110356.1	0.71	29.3	XM_011404313.2	1.17e-06	47.8	no_hit			XM_002158363.3	5.79e-05	42.4	no_hit			XM_014935152.1	3.8	28.5	no_hit			XM_021469783.1	0.0002	45.4	AB096677.1	2.23e-129	370
LEMD2	Q8NC56	no_hit			no_hit			NM_001356079.1	9.3	29.6	AC198686.1	3.5	30	XM_002112624.1	5.69e-16	76.6	XM_019998509.1	1.08e-22	101	XM_001633738.1	6.94e-30	123	XM_002168631.3	1.09e-19	92.8	XM_018103200.1	0.031	42.4	XM_014929342.1	3e-24	107	XM_011675522.1	6e-27	116	BC163283.1	7e-47	179	BC051803.1	0	699
SUN2	Q9UH99	XM_003293510.1	2.3e-25	112	no_hit			XM_013162092.1	7e-25	111	no_hit			XM_002113945.1	6.33e-23	100	XM_019997198.1	4.1e-43	167	XM_001632095.1	1.9e-53	182	XM_012702376.1	1.13e-40	155	BT122181.1	2e-63	226	XM_014932708.1	2e-69	249	XM_011666622.1	3.18e-68	244	XM_009306524.3	9.32e-86	296	NM_001199580.1	0	1134
